# Supplementary material for: Characterization of Properties and Transglycosylation Abilities of Recombinant α-Galactosidase from Cold-Adapted Marine Bacterium Pseudoalteromonas KMM 701 and Its C494N and D451A Mutants
Source: PubMed Central journal article supplement (PMC6213131; doi:10.3390/md16100349), 2018-09-24
Supplement: marinedrugs-16-00349-s001.pdf [file marinedrugs-16-00349-s001.pdf]

# Supplementary Information

Figure S1. MALDI Mass Spectra of reaction product mixtures:

(a) wild  $\alpha$ -PsGal with melibiose and pNP- $\alpha$ -Gal

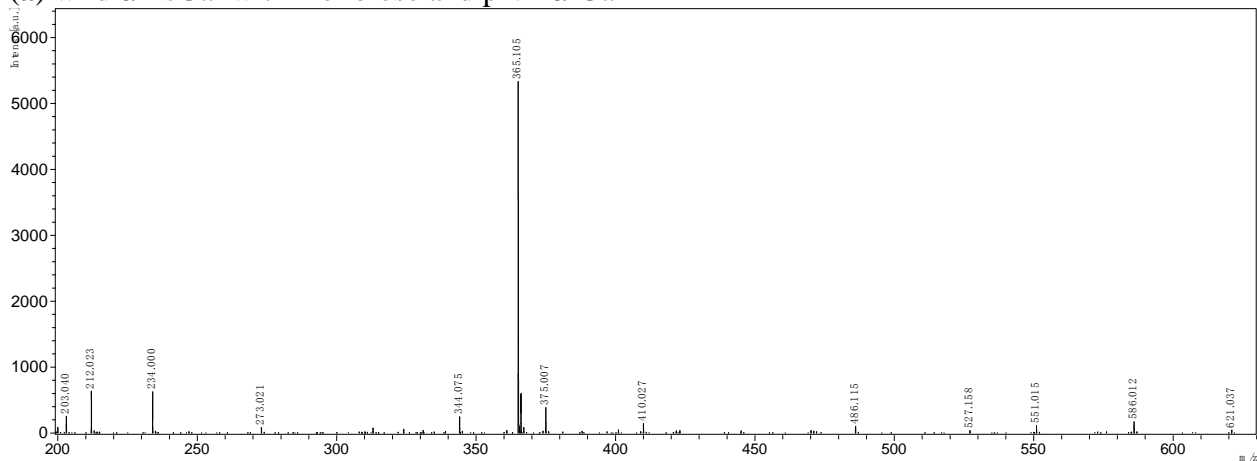

(b) wild  $\alpha$ -PsGal with pNP- $\alpha$ -Gal

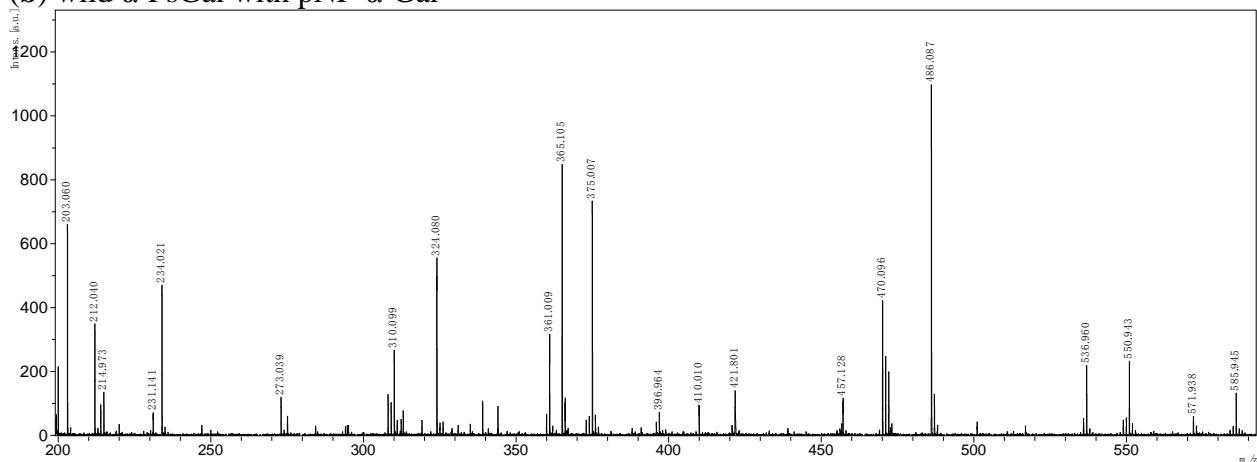

(c) D451A mutant with pNP- $\alpha$ -Gal

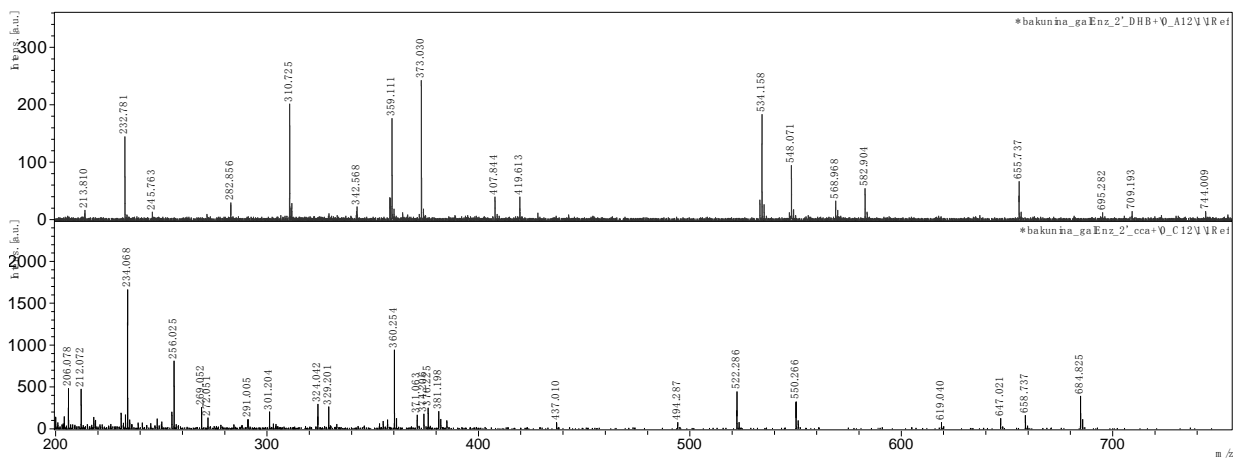

(d) C494N mutant with pNP- $\alpha$ -Gal

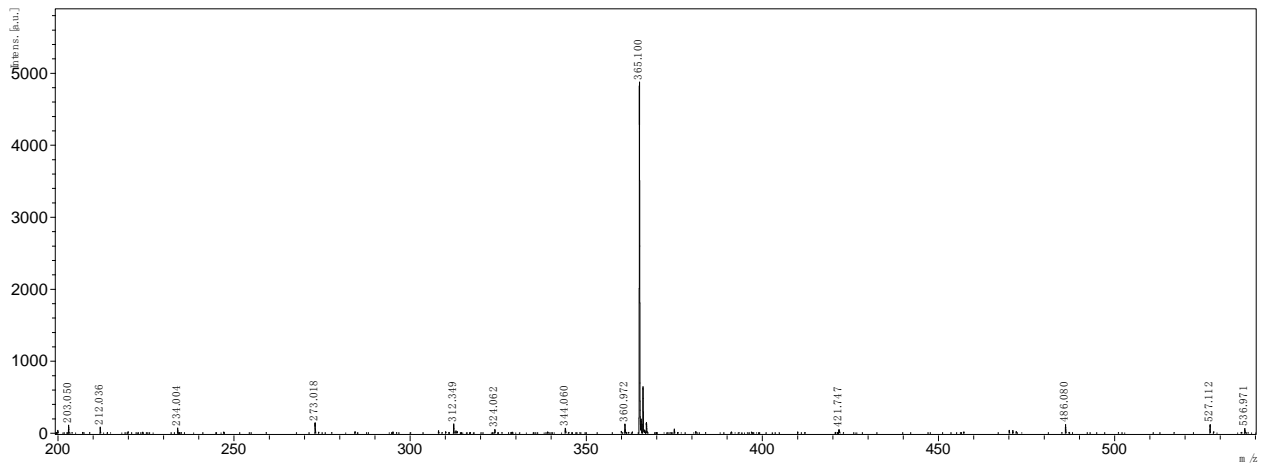

e) MALDI Mass Spectra of cellobiose and melibiose.

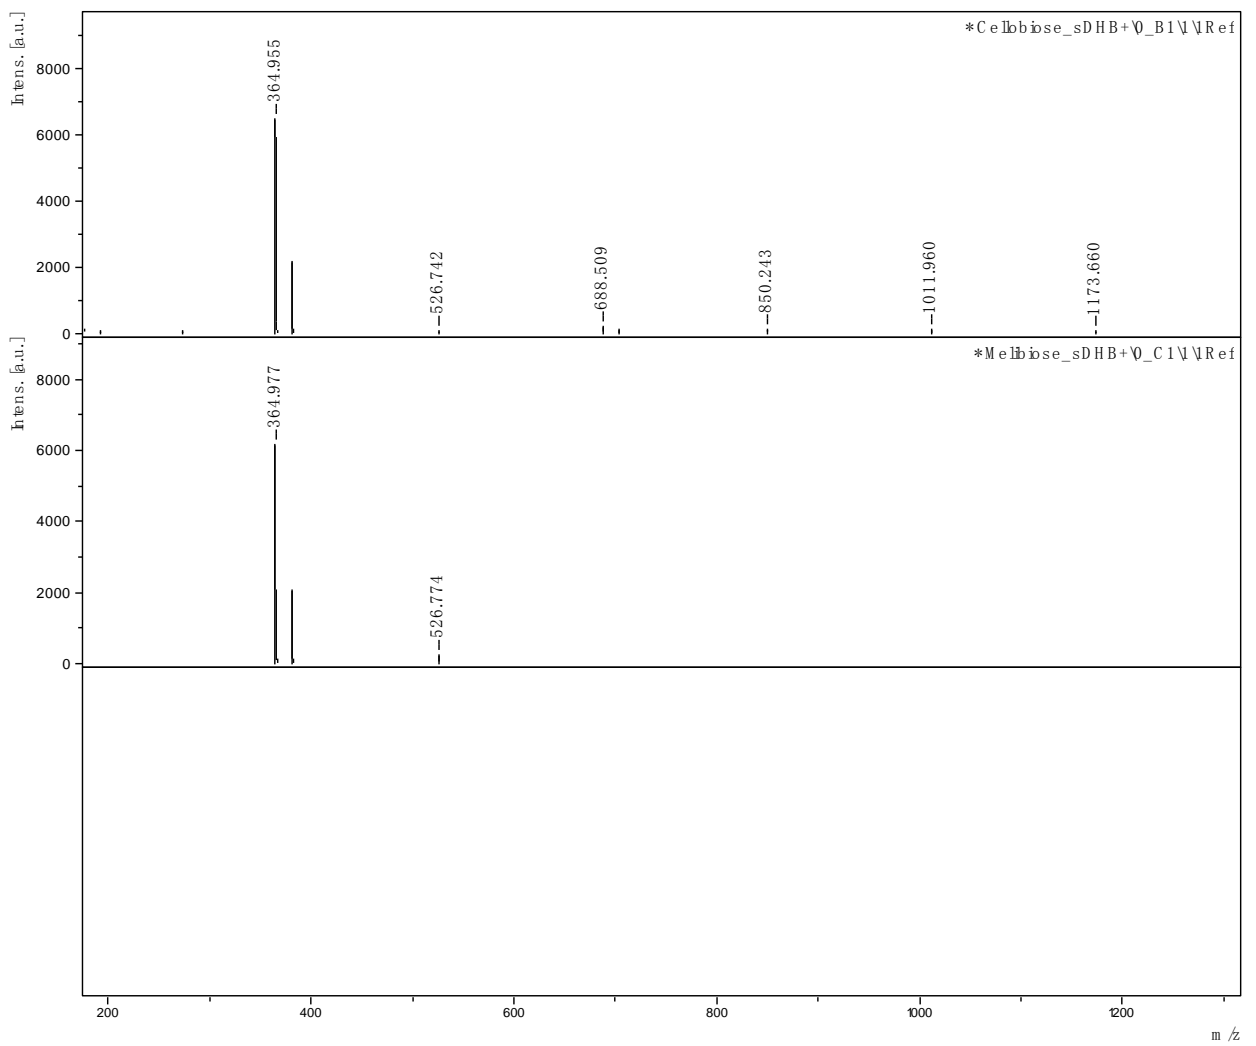

Figure S2. Electrospray ionization tandem mass spectrometry (ESIMS/MS) spectra of the transglycosylation products catalyzed by wild  $\alpha$ -PsGal with melibiose as substrate.

a) (ESIMS/MS) spectra.

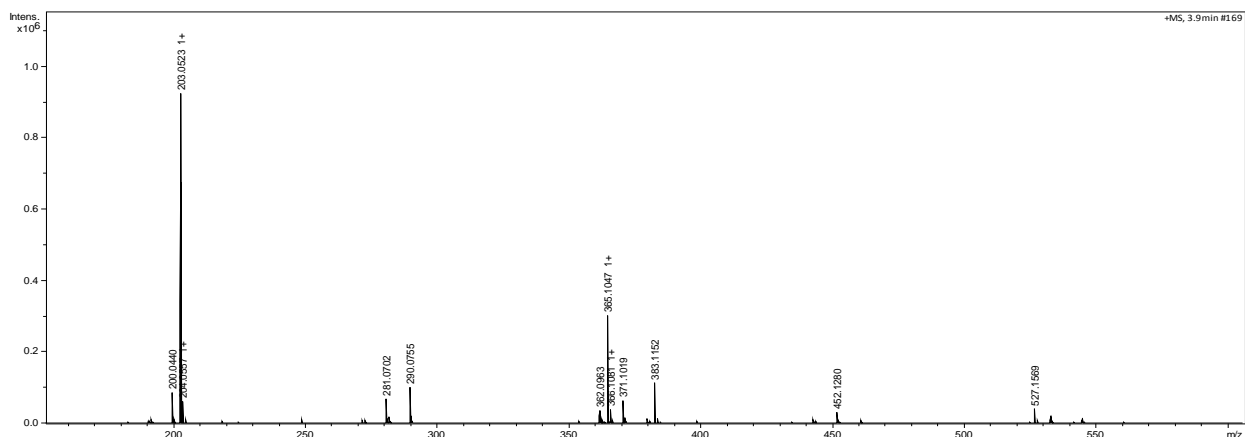

b) Fragmentation of 527 m/z ion

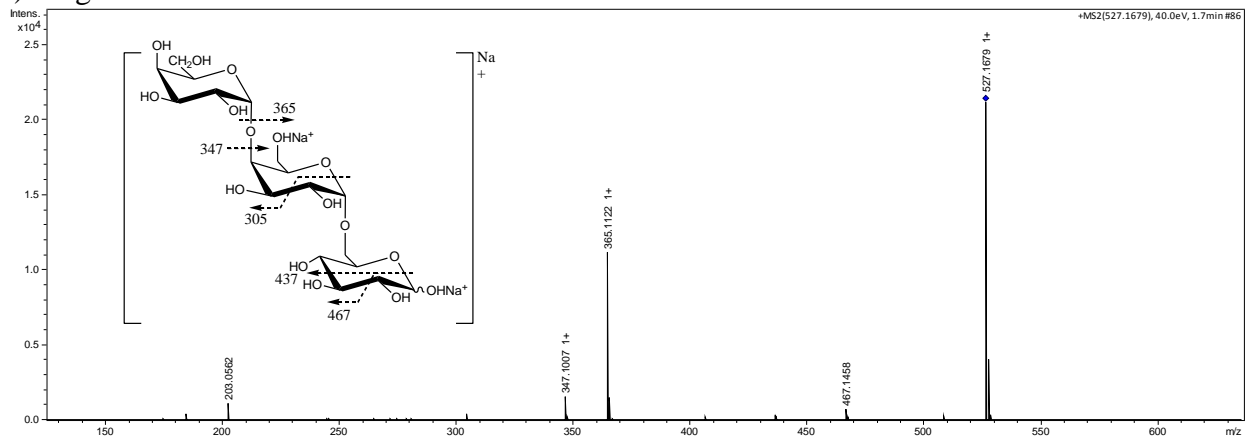

c) Fragmentation of 365 m/z ion

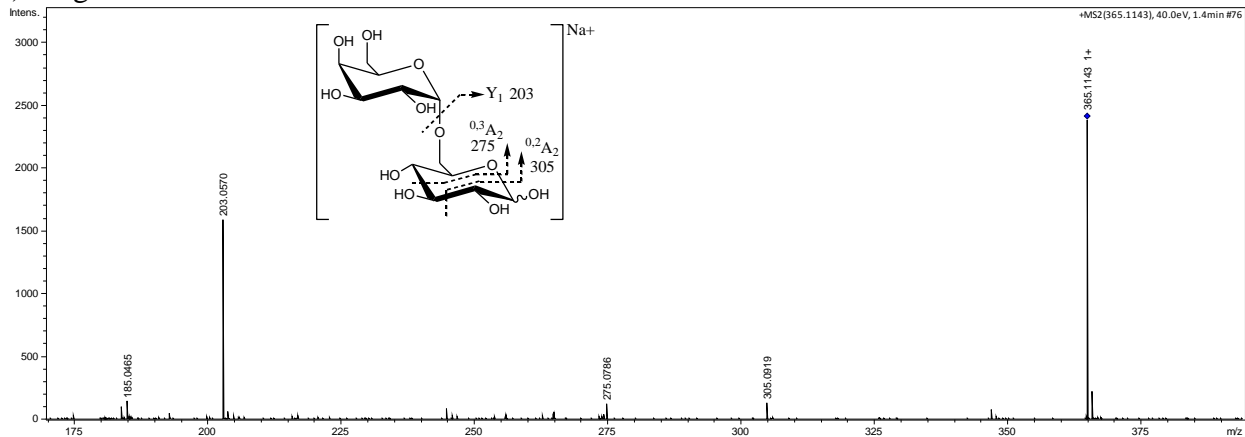

Figure S3. Electro spray ionization tandem mass spectrometry (ESIMS/MS) spectra of the transglycosylation products from pNP-galactoside catalyzed by wild  $\alpha$ -PsGal.

a) Fragmentation of 365 m/z ion

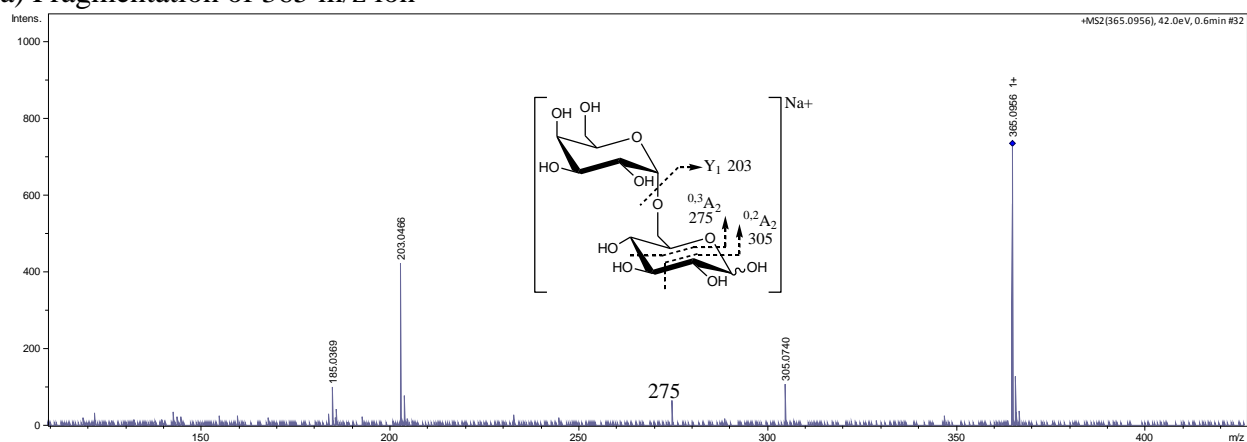

b) Fragmentation of 486 m/z ion

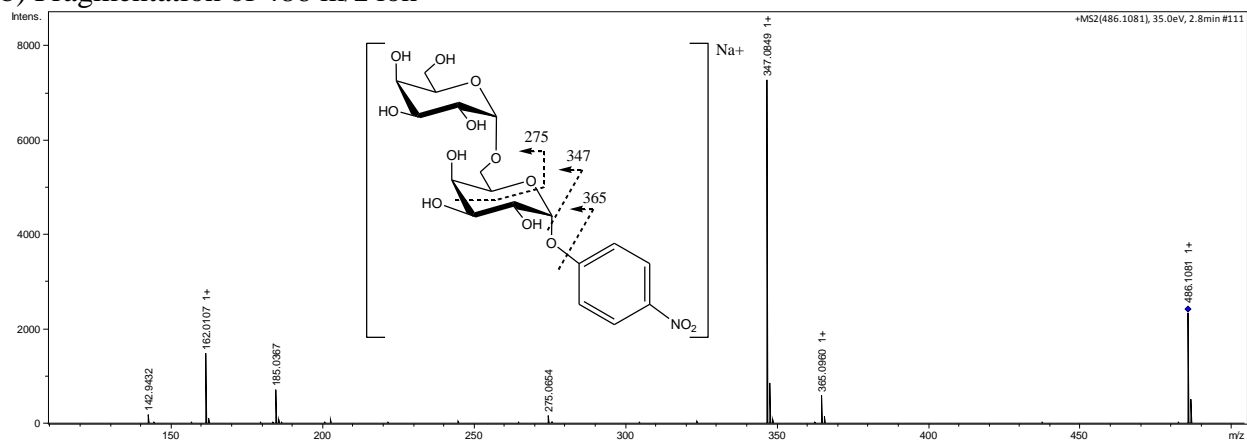

Figure S4. Electro spray ionization tandem mass spectrometry (ESIMS/MS) spectra of the transglycosylation products catalyzed by mutant C494N

a) Melibiose as substrate

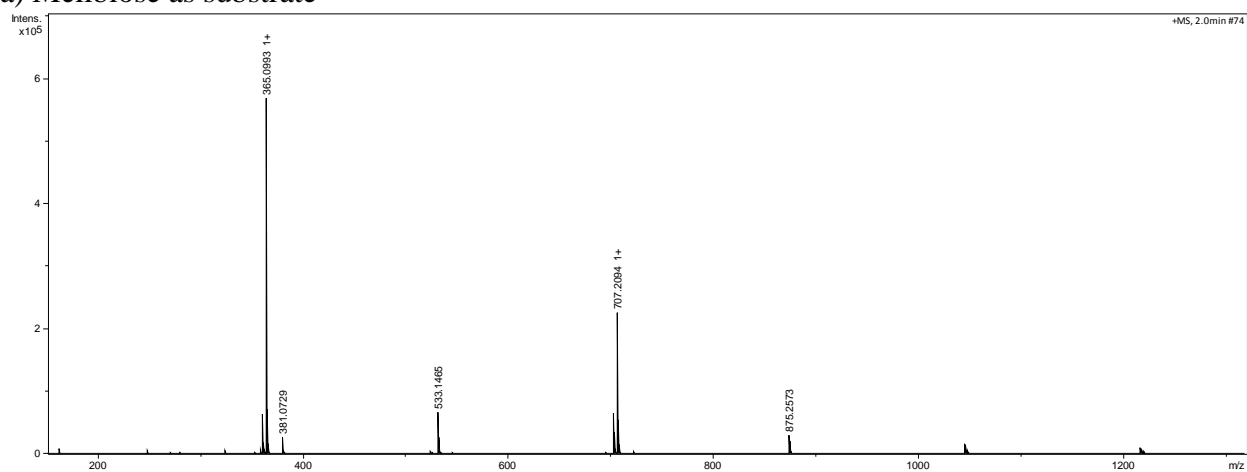

b) Fragmentation of 365 m/z ion

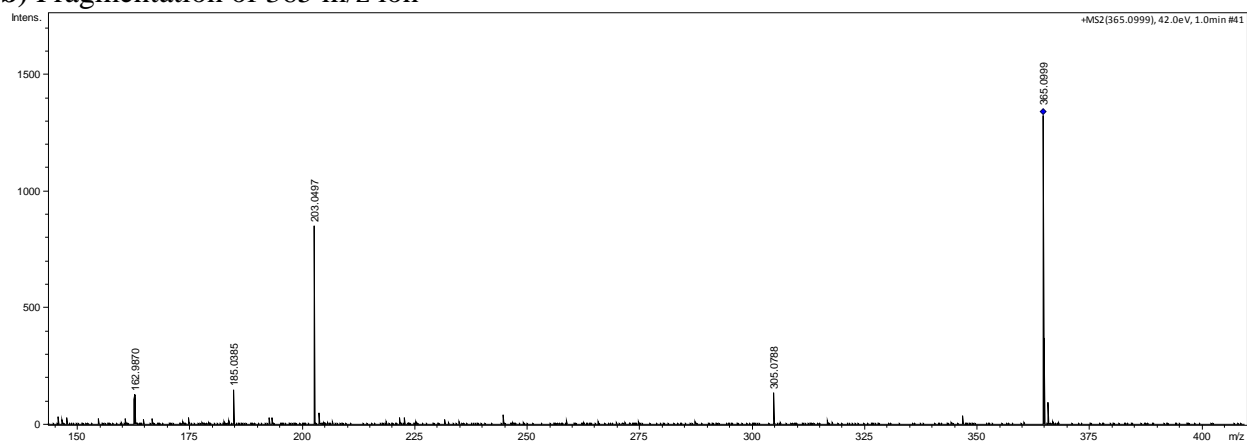

c) pNP- $\alpha$ -Gal as substrate

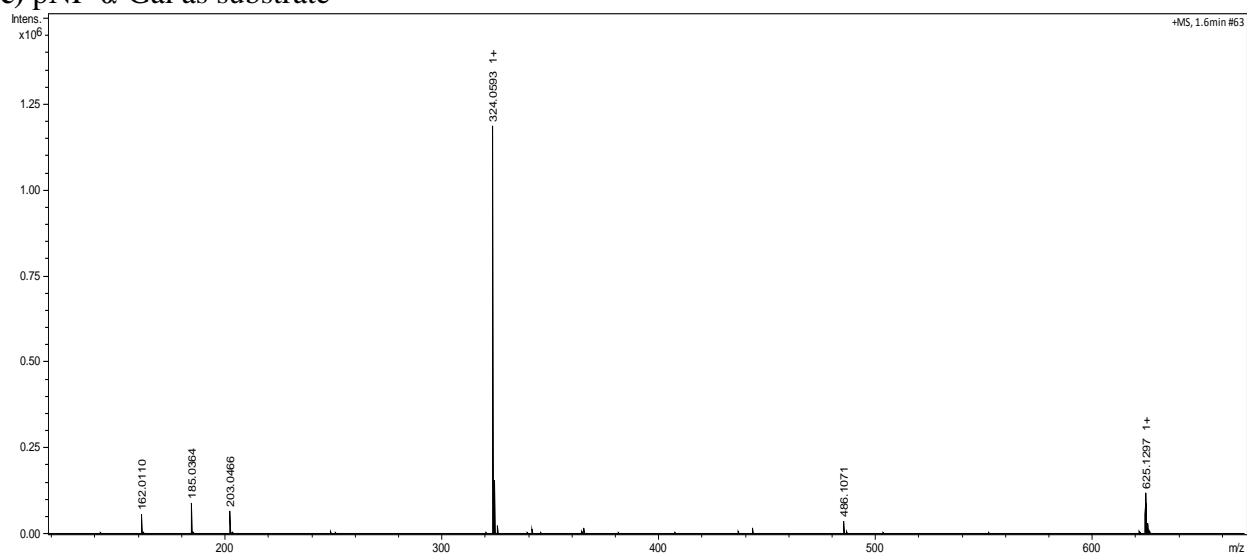

d) Fragmentation of 486 m/z ion

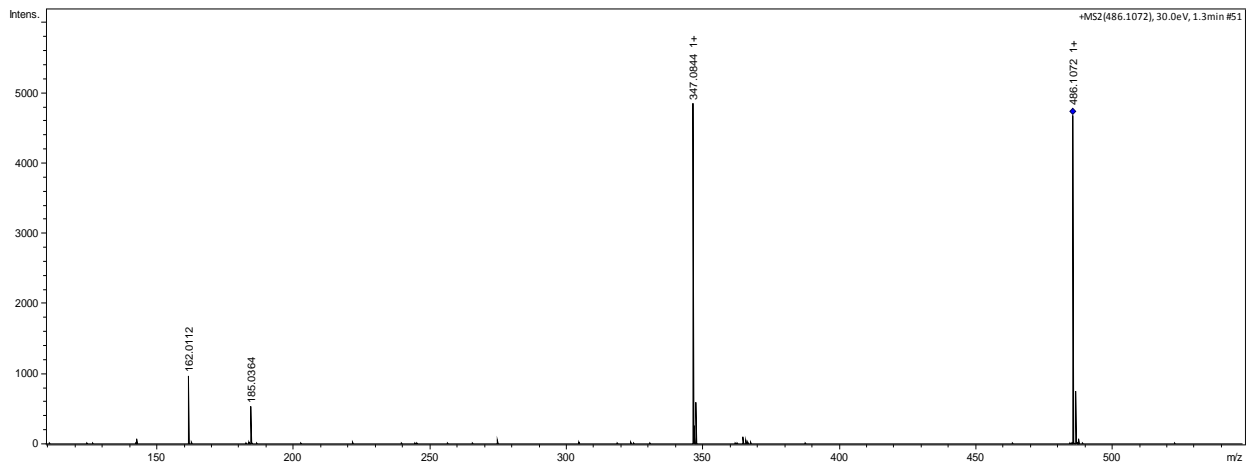

e) Fragmentation of 347 m/z ion

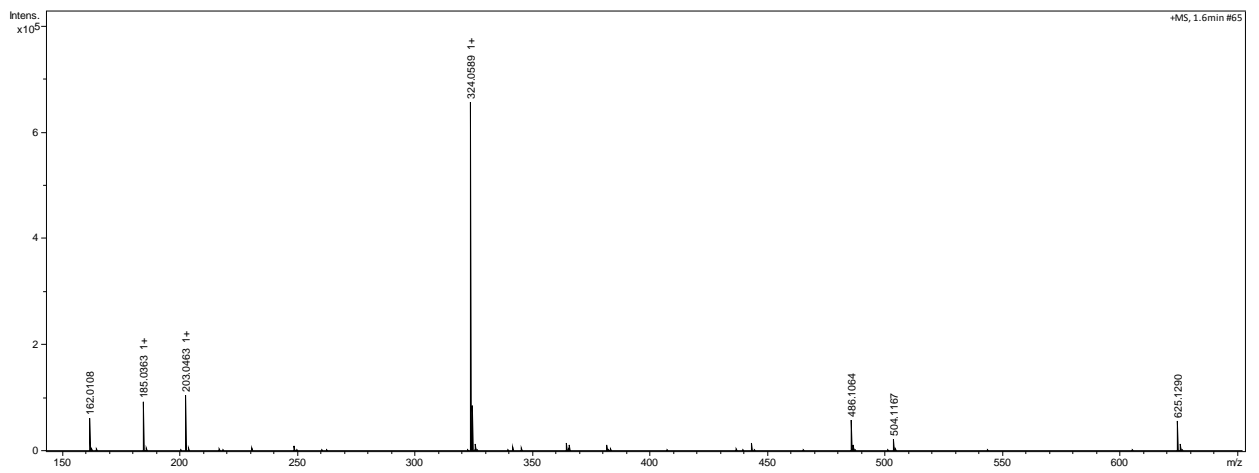

Figure S5. Schemes for presumable mechanism of hydrolysis and transglycosylation of substrates melibiose (a) and pNP- $\alpha$ -Gal (b) with recombinant  $\alpha$ -PaGal. E –  $\alpha$ -PsGal, Gal-(1 $\rightarrow$ 6)- $\alpha$ -Glc – melibiose, pNP- $\alpha$ -Gal – pNP- $\alpha$ -D-galactopyranoside, E : Gal-(1 $\rightarrow$ 6)- $\alpha$ -Glc and E : pNP- $\alpha$ -Gal – equilibrium complexes of  $\alpha$ -PsGal and substrates, E-Gal – covalent enzyme-carbohydrate intermediate, (E : Gal : Gal)' and (E : Gal : Gal)'' – equilibrium double complexes for synthesis of major Gal-(1 $\rightarrow$ 6)- $\alpha$ -Gal and minor Gal- $\alpha$ -(1 $\rightarrow$ 4)-Gal, respectively, (E : Gal : pNP- $\alpha$ -Gal)' and (E : Gal : pNP- $\alpha$ -Gal)'' equilibrium complexes for synthesis of major Gal-(1 $\rightarrow$ 6)- $\alpha$ -Gal- $\alpha$ -pNP and minor Gal- $\alpha$ -(1 $\rightarrow$ 3)-Gal- $\alpha$ -pNP, respectively.

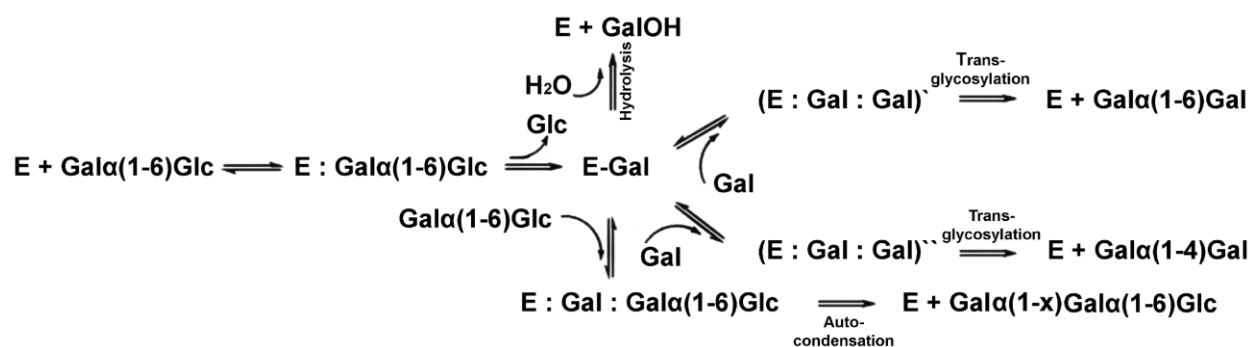

(a)

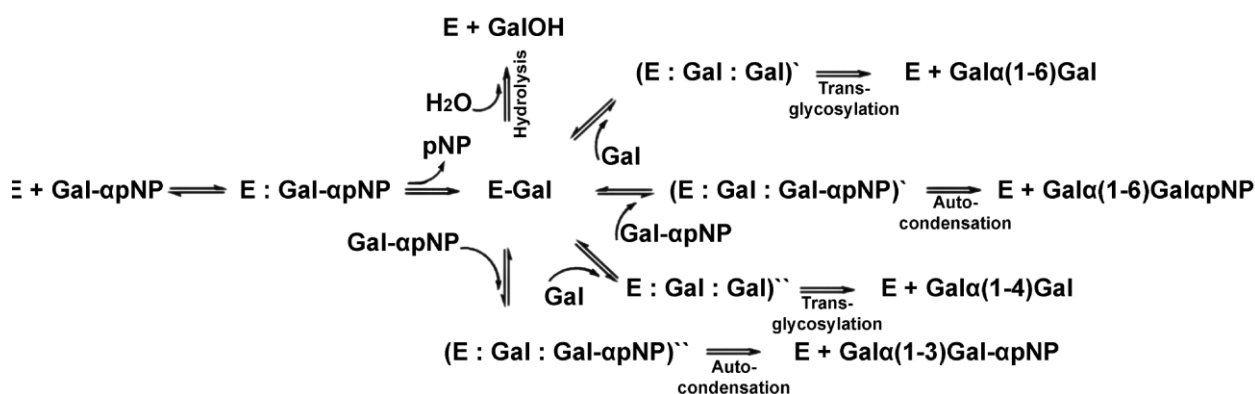

(b)

The first step of the catalytic reaction is a cleavage of the glycosidic bond of the melibiose or pNP- $\alpha$ -Gal molecules, as well as the formation of the covalent galactosyl-enzyme intermediate. The molecular of glucose (Glc) and pNP are leaving groups. On the second step water or some carbohydrate, molecules attack the covalent galactosyl-enzyme intermediate, and then hydrolysis or transglycosylation, respectively, can be observed. In the case when substrate is an attacking molecule, we observe the reaction of autocondensation.

The table S1 shows data for models of complexes obtained with the module Ligand Interaction of MOE program, as well as 2D-diagrams of the D-Gal binding sites in the wild  $\alpha$ -PsGal and mutant C494N (Figure 7).

The 3D-structures of D-Gal complexes with the active centers of the  $\alpha$ -PsGal and mutant C494N models used by MOE program module Ligand Interaction are shown in the picture for the reviewer. The figure shows the hydrogen bonds and the distances between the D-Gal atoms and the amino acid residues of the models.

Table S1 is supplemented with screenshots of the MOE program.

**Table S1**

**Ligand Interactions Report**

Tue Aug 07 11:50:44 2018 (MOE 2018.01)

wild PsGal/ D-Gal

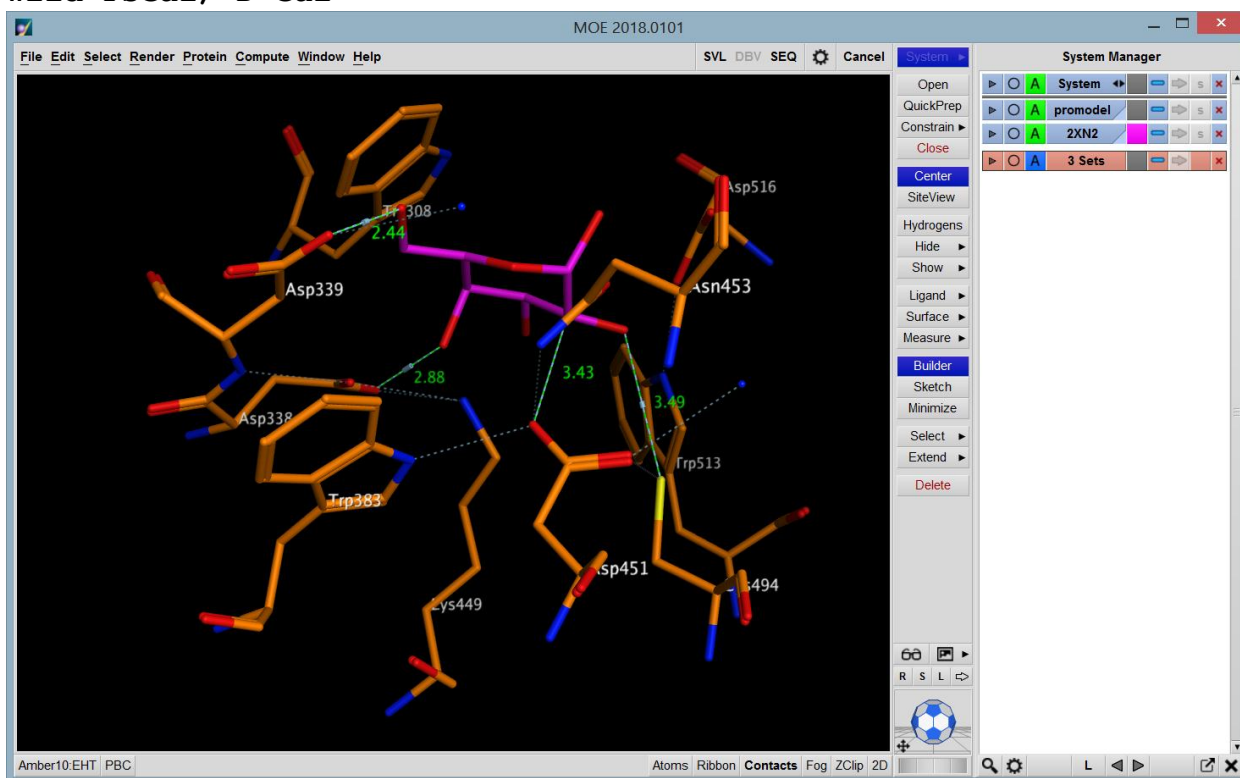

| Ligand<br>(kcal/mol) | Receptor    | Interaction | Distance | E    |
|----------------------|-------------|-------------|----------|------|
| C2 2                 | OD2 ASP 451 | H-donor     | 3.43     | -0.5 |
| O2 8                 | SG CYS 494  | H-donor     | 3.49     | -1.2 |
| O4 10                | OD1 ASP 338 | H-donor     | 2.88     | -2.2 |
| O6 12                | OD2 ASP 339 | H-donor     | 2.44     | -1.0 |
| O2 8                 | N GLY 497   | H-acceptor  | 3.29     | -0.9 |



mutant PsGal C494N / D-Gal

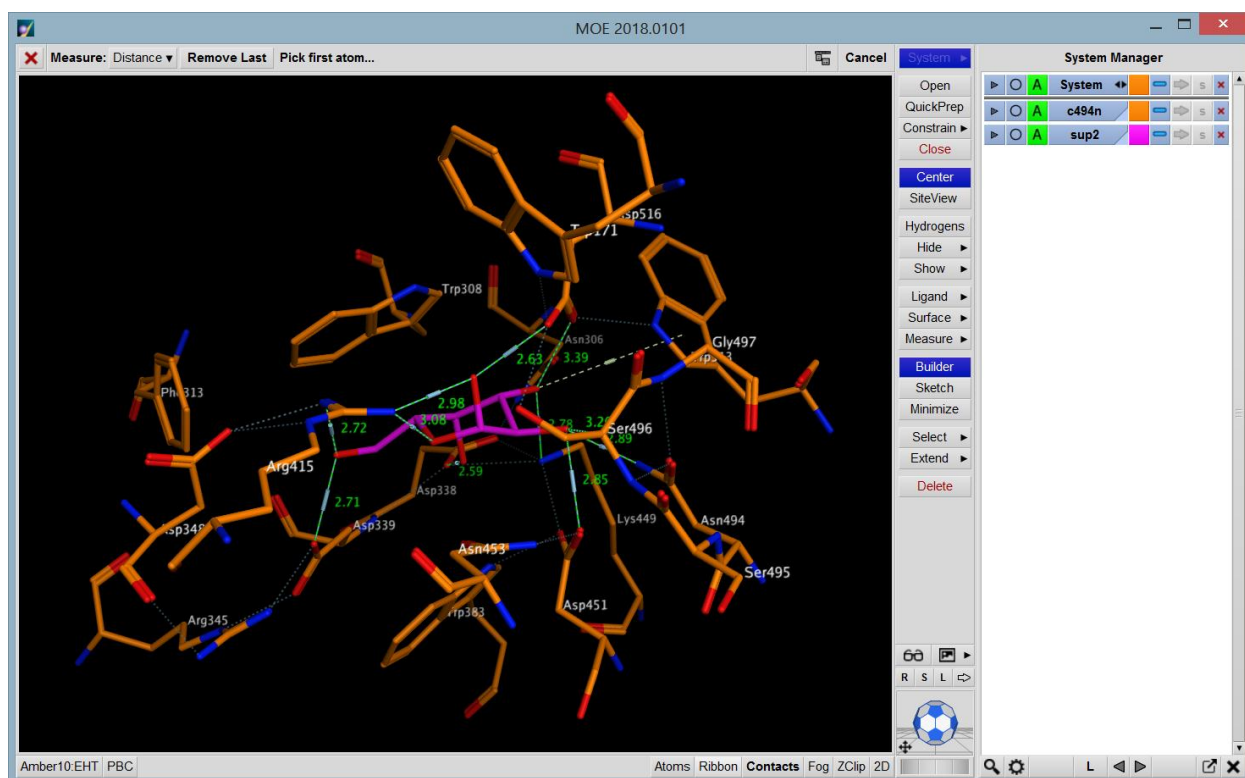

| Ligand<br>(kcal/mol) | Receptor       | Interaction | Distance | E    |
|----------------------|----------------|-------------|----------|------|
| O1 7                 | OD2 ASP 516    | H-donor     | 2.63     | -2.8 |
| O2 8                 | OD1 ASP 451    | H-donor     | 2.85     | -3.8 |
| O3 9                 | OD1 ASP 516    | H-donor     | 3.39     | -0.5 |
| O4 10                | OD2 ASP 338    | H-donor     | 2.59     | -3.5 |
| O6 12                | OD2 ASP 339    | H-donor     | 2.71     | -3.5 |
| O1 7                 | NH1 ARG 415    | H-acceptor  | 2.98     | -3.2 |
| O2 8                 | ND2 ASN 494    | H-acceptor  | 2.89     | -1.3 |
| O2 8                 | CA SER 496     | H-acceptor  | 3.26     | -0.5 |
| O3 9                 | NZ LYS 449     | H-acceptor  | 2.78     | -7.3 |
| O5 11                | NH1 ARG 415    | H-acceptor  | 3.08     | -1.1 |
| O6 12                | NH2 ARG 415    | H-acceptor  | 2.72     | -2.7 |
| O3 9                 | 5-ring TRP 513 | H-pi        | 4.52     | -1.5 |
